# Supplementary material for: Spectral tuning of diamond photonic crystal slabs by deposition of a thin layer with silicon vacancy centers
Source: publisher site journal article supplement (doi:10.1515/nanoph-2021-0369), 2021-09-16
Supplement: Supplementary file 1 [file j_nanoph-2021-0369_suppl.docx]

Supplementary information to: **Spectral tuning of diamond photonic crystal slabs by deposition of a thin layer with silicon vacancy centers**

Jan Fait*,1, Marián Varga1,2, Karel Hruška1, Alexander Kromka1, Bohuslav Rezek3 and Lukáš Ondič1

1 Institute of Physics CAS, Cukrovarnická 10, 16200 Prague, Czech Republic

2 Institute of Electrical Engineering, Slovak Academy of Sciences, Dúbravská cesta 9, 841 04 Bratislava, Slovak Republic

3 Faculty of Electrical Engineering, Czech Technical University in Prague, Technická 2, 16627 Prague, Czech Republic

*Corresponding author: e-mail fait@fzu.cz, phone +420 220 318 475

1. **Refractive index of diamond layers**

Refractive index data used for the simulation shown in Fig. 2 in the main text are shown in Fig. S1. Specifically, we used the measured refractive index for the layer deposited by linear antenna microwave (MW) plasma system (black curve), and constant refractive index of 2.41 (black dashed curve). The refractive index of the overgrown layer, which was deposited by focused MW plasma reactor, is slightly higher (red curve) than in linear antenna system as we measured on a reference sample. Note that the refractive index depends not only on the deposition system but also on the parameters of the deposition. The blue curve in Fig. S1 is the refractive index of monocrystalline diamond as measured in [1], and that is close to 2.41 value in the red part of spectra.

| **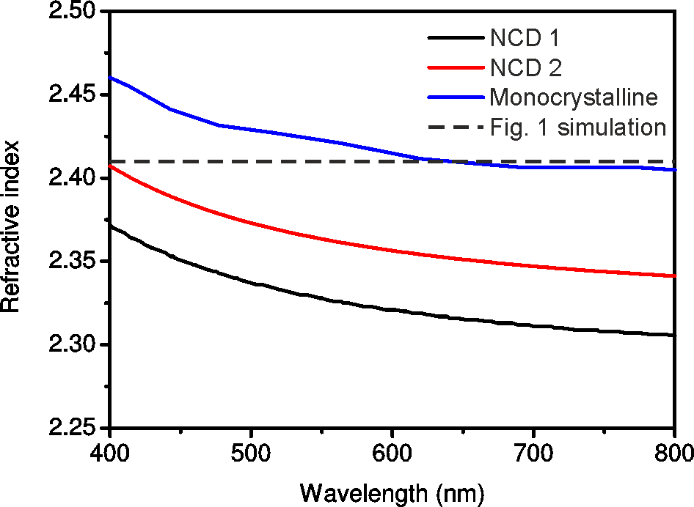**  **Figure S1**: Refractive index of diamond: black solid – refractive index of the layer deposited by linear antenna MW plasma system; red – refractive index of the layer deposited by focused MW plasma system; blue – refractive index of monocrystalline diamond as measured in [1]; black dashed – constant refractive index of 2.41 that was used for one of the simulations in Fig. 2 in the main text. |
| --- |

1. **Original layer photoluminescence**

The PL of the original layer deposited by linear antenna MW plasma system (see Materials and methods section in the main text for details) is shown in Fig. S2. The spectrum was measured with 100x objective (NA = 0.9) in order to collect the maximal signal. The SiV peak is absent in the spectrum of the original layer, which is enabled by the use of deposition system with plasma located further away from the sample. The broad PL band originates from intrinsic defects of the nanocrystalline diamond layer.

| **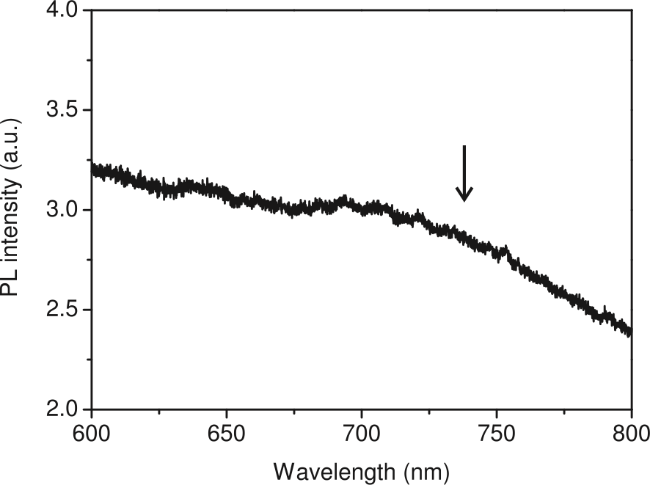**  **Figure S2**: PL spectra measured on the original structure. Arrow denotes the position of SiV ZPL that is absent in the spectra. |
| --- |

1. **Reference diamond layer**

Figure S3 shows the SEM morphology of the reference diamond layer without PhC patterning before and after the deposition of tuning layer. The thickness of the layer before and after overgrown is 160 nm and 220 nm, respectively. The part of the sample used for reference was masked during the fabrication of the PhC slab using reactive ion etching.

| **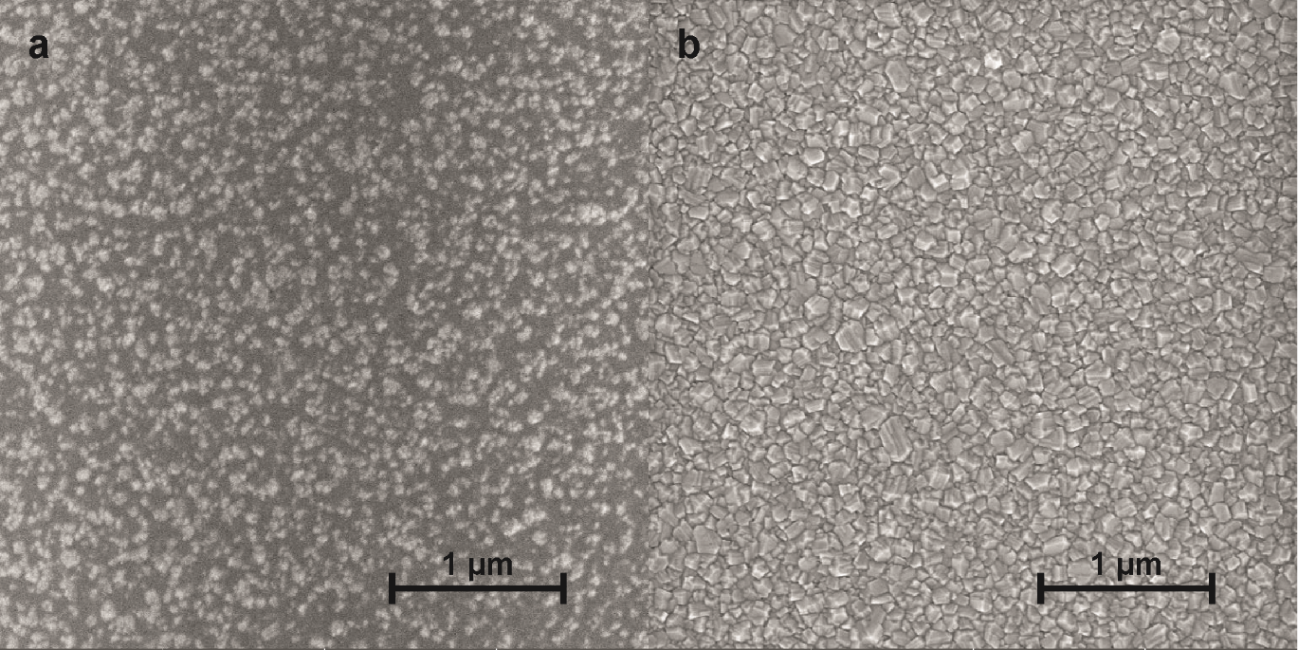**  **Figure S3**: SEM morphology of the reference diamond layer before **(a)** and after **(b)** deposition of the tuning layer. |
| --- |

1. **Electric field distribution of the leaky modes**

The simulated (RCWA) distribution of the electric field of the TE0 and TM0 leaky mode is shown in Figs. S4 and S5, respectively, for one cut of the unit cell. The real sample shape (estimated by black dashed line) deviates from the ideal shape used for the simulation (white lines). The SiV centers are located only in the top part of the PhC (above dashed red line) and their average coupling efficiency to leaky modes thus differs from the continuous PL background with emitters located throughout the whole diamond layer. Fields at other cuts (between columns) can be found in the attached gif files.

| **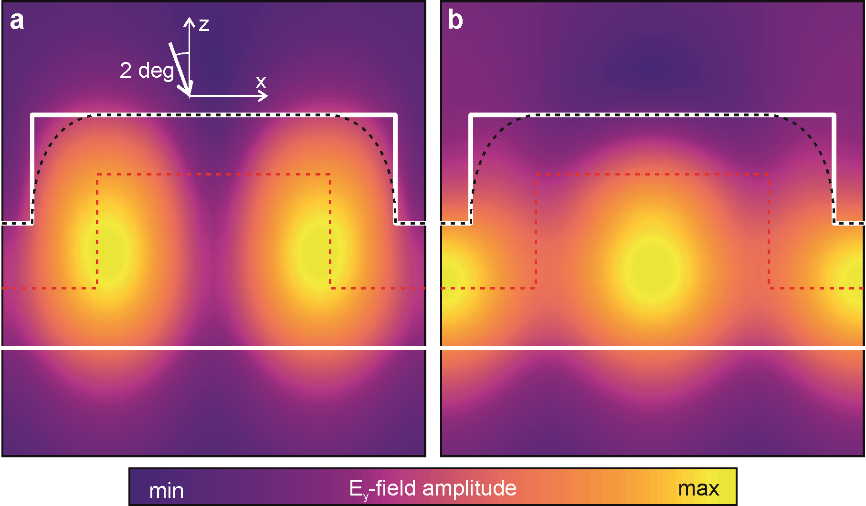**  **Figure S4**: Simulated profile of the TE0 mode electric field (Ey component) for wavelengths above (a) and below (b) 757 nm at the y = 0 cut of the PhC unit cell. White lines indicate the edges of the unit cell of the simulated structure. Black dashed line estimates the real sample dimensions. Red dashed line separates the original structure on the bottom (without SiV centers) and the tuning layer (with SiV centers). |
| --- |

| **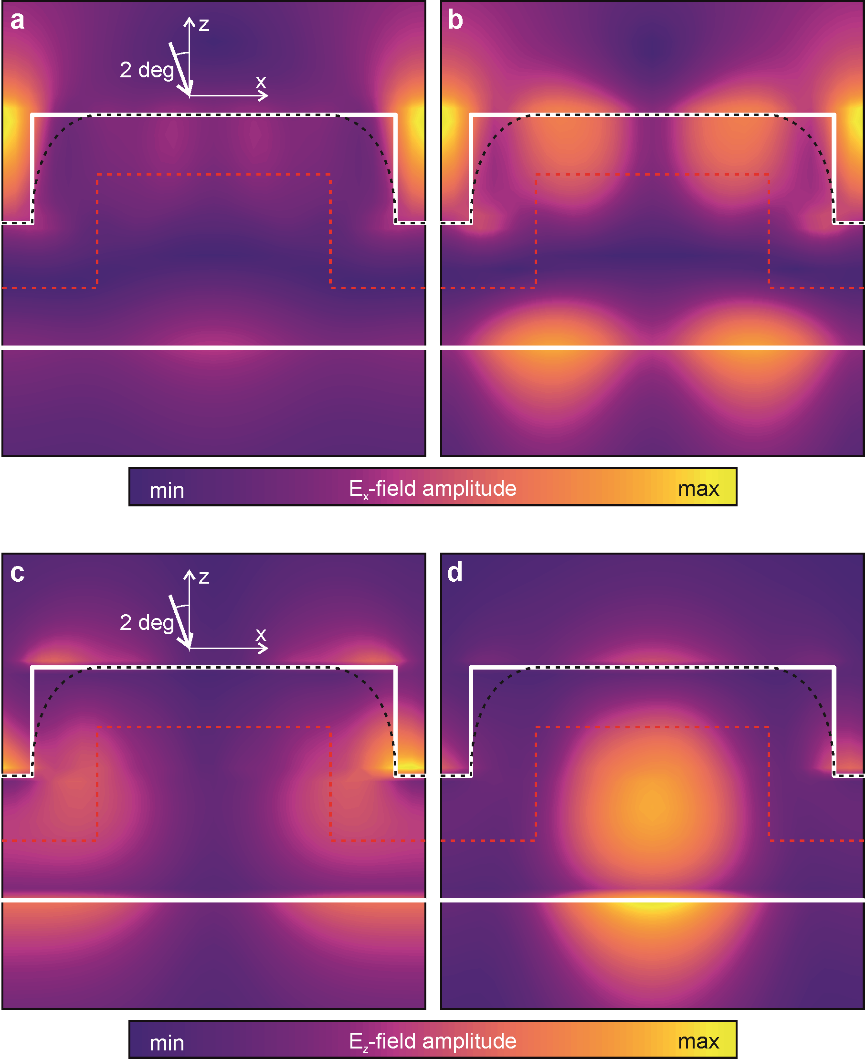**  **Figure S5**: Simulated profile of the TM0 mode electric field for wavelengths above **(a)** Ex component, **(c)** Ez component and below **(b)** Ex component, **(d)** Ez component 693 nm at the y = 0 cut of the PhC unit cell. White lines indicate the edges of the unit cell of the simulated structure. Black dashed line estimates the real sample dimensions. Red dashed line separates the original structure on the bottom (without SiV centers) and the tuning layer (with SiV centers). |
| --- |

1. **Extraction circles**

Figure S6 shows the RCWA simulation of the angle resolved transmission efficiency for selected wavelengths. The circles show the whole area of escape cone, where the modes are leaky. The central point corresponds to the vertical direction. The edge of the circle corresponds to extraction into the tangential direction, which is inconvenient for the collection. For wavelengths in region II. (roughly between 720 nm and 780 nm for the sample with tuning layer, see the main text), the highest fraction of leaky modes is collected with low NA objectives. Higher NA objectives are needed to collect the light in regions I. and III.

| **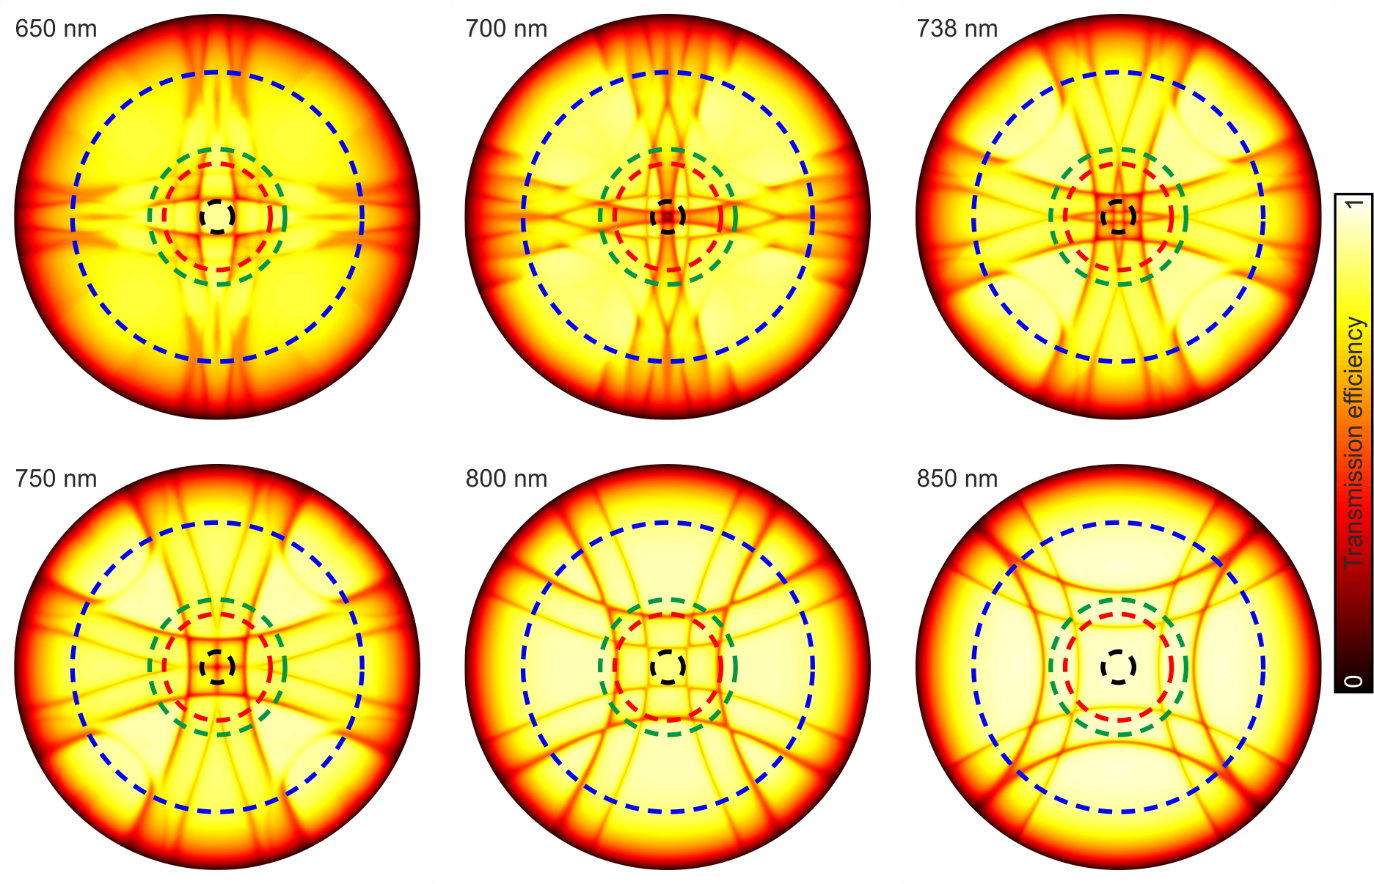**  **Figure S6**: Simulation of angle-resolved transmission efficiency: center of circles corresponds to vertical direction and edge of the circle to 90° angle of incidence. The dashed circles denote the maximal collection of angles of objectives with 0.12 (black), 0.4 (red), 0.5 (green), and 0.9 (blue) NA. |
| --- |

1. **Homogeneity of the PhC slab**

Graph of the PL intensity measured on 6 different places over the 1 x 1 mm2 large PhC slab structure (with NA = 0.12 and NA = 0.4 objectives) is shown in Fig. S7. There is a small spectral shift of ≈ 2 nm between the leaky modes at individual places. There is also small difference in the intensity of the signal that may be caused by the different properties of the sample or by different focusing. Averages from these spectra were used to prepare the graphs in the main text.

| **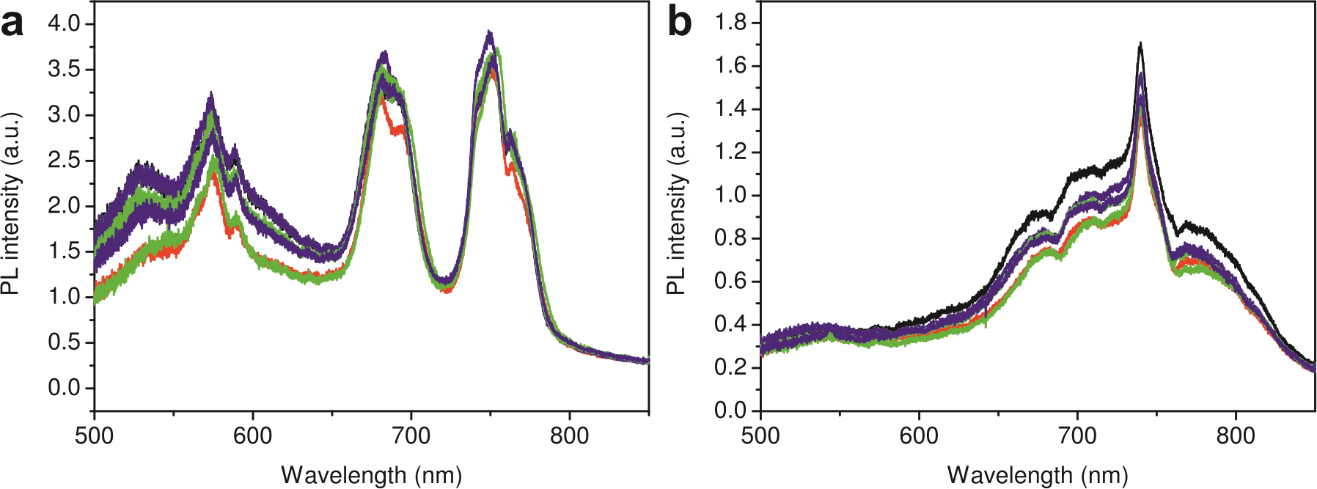**  **Figure S7**: PL intensity measured on 6 different places of the sample with NA = 0.12 **(a)** and NA = 0.4 **(b)** objectives. |
| --- |

1. **Angle-resolved transmission and PL setup**

The angle-resolved transmission measurement was performed on the setup schematically shown in Fig. S8(a). Light bulb with white light spectrum was coupled to optical fiber. Output port of the optical fiber was used as a point-like source and a lens was used to collimate the beam. Transmission spectra were measured for angles from 0° to ≈ 25° with a step 0.6°. The individual measurements were stacked to create the band diagrams shown in Fig. 3 in the main text. Figure S8(b) shows the setup used for the angle-resolved PL measurement shown in the Fig. 5 in the main text. A He-Cd laser (442 nm) was used for the excitation of the PL.

| **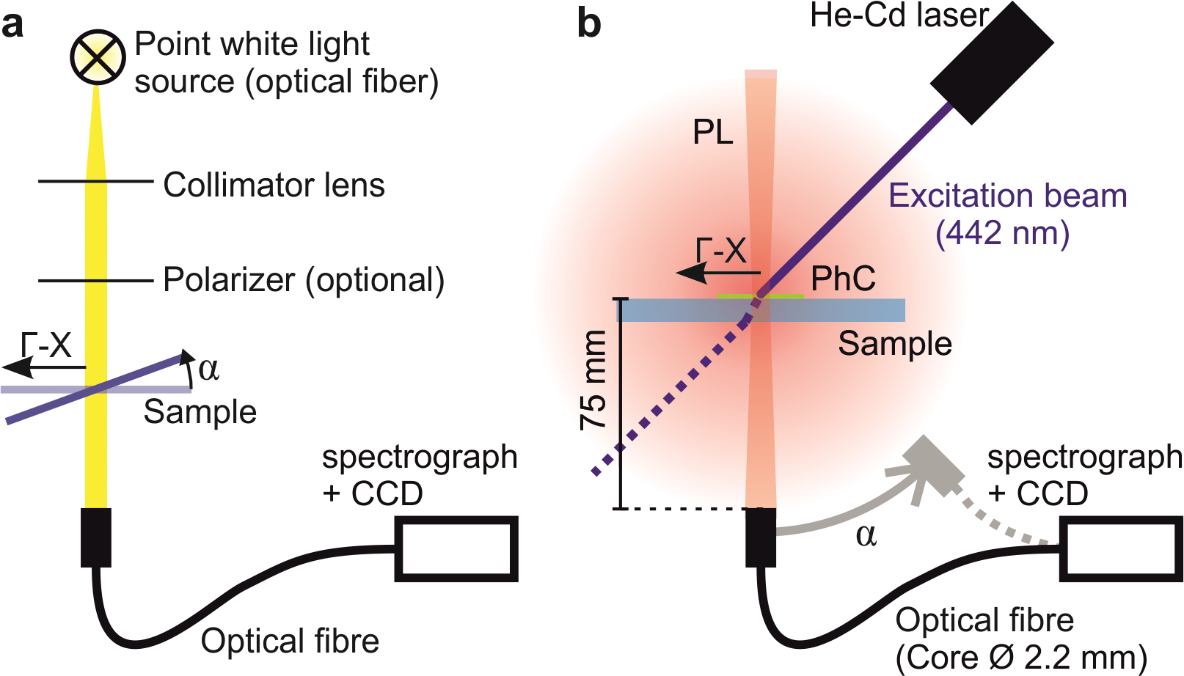**  **Figure S8**: Scheme of the setup used for the angle-resolved transmission efficiency measurement **(a)** and for the angle-resolved PL measurement **(b)**. |
| --- |

**References:**

[1] H.R. Phillip, E.A. Taft, Kramers-Kronig Analysis of Reflectance Data for Diamond, Phys. Rev. 136 (1964) A1445–A1448. https://doi.org/10.1103/PhysRev.136.A1445.
